# Supplementary material for: DeepNeo: a webserver for predicting immunogenic neoantigens
Source: PubMed Central journal article supplement — Nucleic Acids Res. 2023 Apr 18;51(W1):W134–40. doi: 10.1093/nar/gkad275 (PMC10320182; doi:10.1093/nar/gkad275), 2023-04-18
Supplement: gkad275_supplemental_file.pdf [file gkad275_supplemental_file.pdf]

Supplementary Figure 1

A

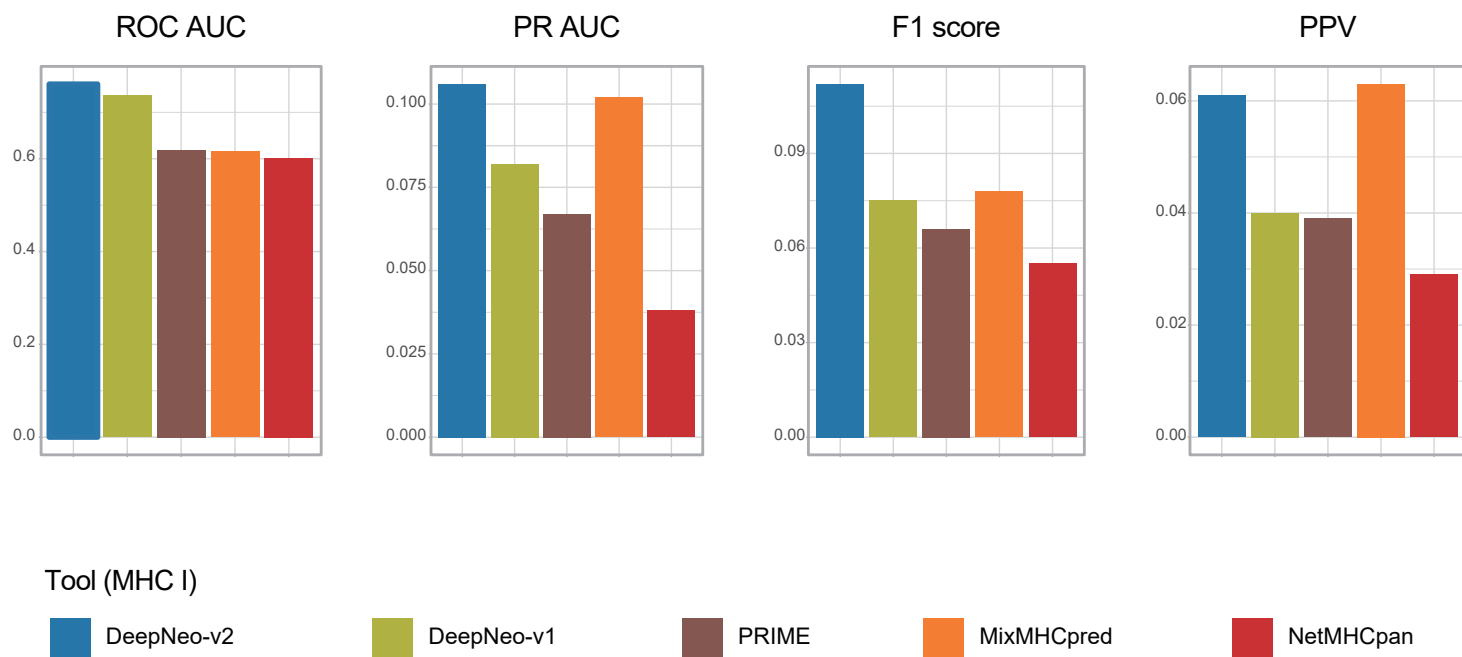

B

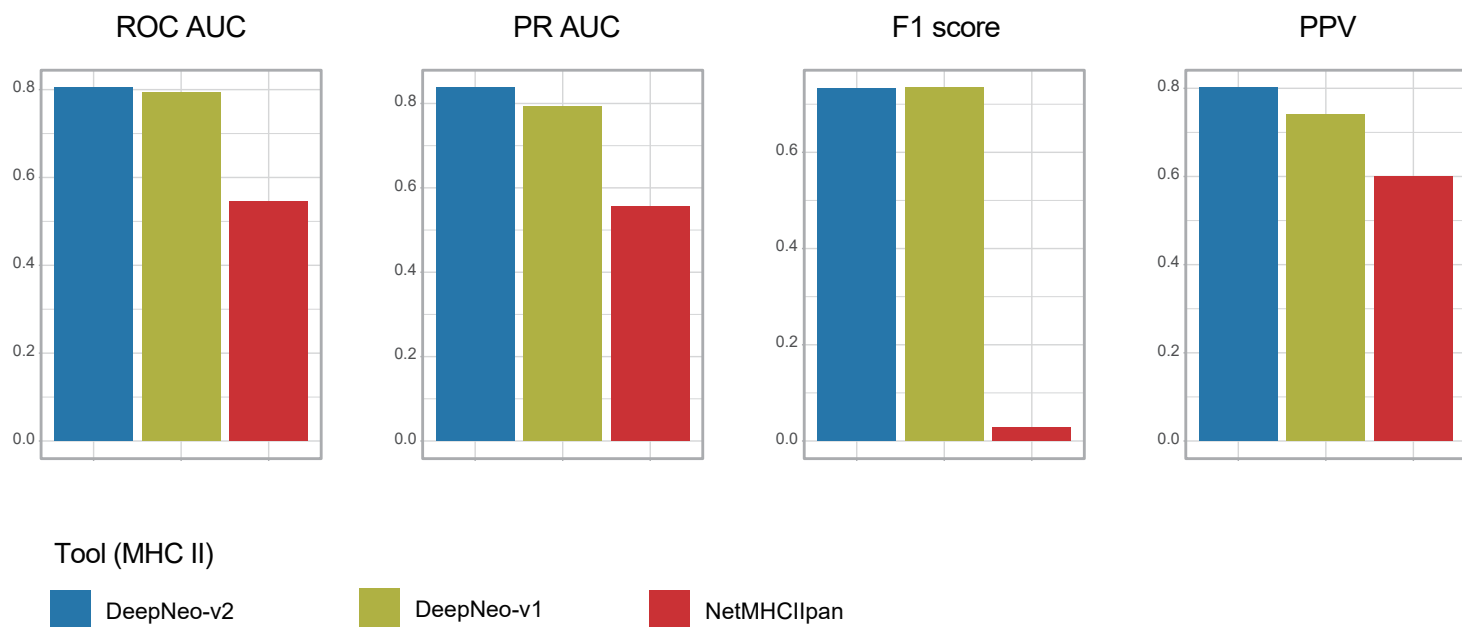

**Supplementary Figure 1.** Accuracy metrics for external validation sets. In MHC I (A) and II (B), external validation sets were applied to examine prediction performances. The prediction power is measured with ROC AUC, PR AUC, F1 score, and PPV. In both classes, DeepNeo-v2 outperforms other tools.

Supplementary Table 1

| Input size | DeepNeo-v1 | DeepNeo-v2.0 |
|------------|------------|--------------|
| 10         | 4.56       | 0.47         |
| 100        | 6.16       | 0.63         |
| 1000       | 13.69      | 1.72         |

**Supplementary Table 1.** Comparison of runtime. After code optimization and platform upgrade, the mean runtime(sec) per input size showed significant decrease in DeepNeo-v2, appropriate to be implemented as webserver.

Supplementary Table 2

| Training set |               | Test set performance |              |              | External validation performance |              |              |
|--------------|---------------|----------------------|--------------|--------------|---------------------------------|--------------|--------------|
| Positive %   | Data          | ROC AUC              | PR AUC       | F1 score     | ROC AUC                         | PR AUC       | F1 score     |
| <b>42.6%</b> | <b>19,149</b> | <b>0.805</b>         | <b>0.713</b> | <b>0.687</b> | <b>0.761</b>                    | <b>0.106</b> | <b>0.112</b> |
| 25.7%        | 31,681        | 0.796                | 0.548        | 0.481        | 0.757                           | 0.081        | 0.134        |
| 30%          | 27,160        | 0.801                | 0.603        | 0.521        | 0.723                           | 0.078        | 0.108        |
| 35%          | 23,280        | 0.803                | 0.660        | 0.599        | 0.761                           | 0.087        | 0.122        |
| 45%          | 18,107        | 0.795                | 0.722        | 0.700        | 0.763                           | 0.092        | 0.091        |
| 50%          | 16,296        | 0.796                | 0.767        | 0.737        | 0.758                           | 0.090        | 0.093        |

**Supplementary Table 2.** Comparison of model performance according to label composition of training set. To find optimal label composition, multiple ratios were employed and tested. The label composition with the most balanced accuracy metrics across the three datasets are selected as the optimal data composition.
